# Supplementary material
Source: PubMed Central journal article supplement (PMC7249560)
Supplement: M20-1515_Supplement.pdf [file M20-1515_Supplement.pdf]

## Supplementary Material\*

Mackey K, King VJ, Gurley S, Kiefer M, Liederbauer E, Vela K, Sonnen P, Kansagara D. Risks and Impact of Angiotensin-Converting Enzyme Inhibitors or Angiotensin-Receptor Blockers on SARS-CoV-2 Infection in Adults. A Living Systematic Review. *Ann Intern Med.* 19 May 2020 [Epub ahead of print]. doi:10.7326/M20-1515

### *Supplement.* **Supplemental Appendices**

**Appendix A.** Search Strategy

**Appendix B.** Quality Assessment of Cohort Studies Using the Newcastle–Ottawa Quality Assessment Scale

**Appendix C.** Quality Assessment of Case–Control Studies Using the Newcastle–Ottawa Quality Assessment Scale

\* This supplementary material was provided by the authors to give readers further details on their article. The material was reviewed but not copyedited.

## Appendix A: Search Strategy

| <b>Search for primary literature</b>                                                                                              |                                                                                                                                                                                                                                                                                                                                                           |
|-----------------------------------------------------------------------------------------------------------------------------------|-----------------------------------------------------------------------------------------------------------------------------------------------------------------------------------------------------------------------------------------------------------------------------------------------------------------------------------------------------------|
| <b>MEDLINE [Ovid MEDLINE(R) and Epub Ahead of Print, In-Process &amp; Other Non-Indexed Citations, Daily and Versions(R) 1946</b> |                                                                                                                                                                                                                                                                                                                                                           |
| #                                                                                                                                 | Search Statement                                                                                                                                                                                                                                                                                                                                          |
| 1                                                                                                                                 | Middle East Respiratory Syndrome Coronavirus/ or SARS Virus/                                                                                                                                                                                                                                                                                              |
| 2                                                                                                                                 | (Severe Acute Respiratory Syndrome Coronavirus 2 or COVID-19 or COVID19 or novel coronavirus or coronavirus or corona virus or SARS-CoV or SARS-CoV-2 or SARS2 or 2019-nCoV or Middle East Respiratory Syndrome or MERS or MERS virus or MERS viruses or MERS-CoV or Severe Acute Respiratory Syndrome or SARS or SARS-CoV or SARS coronavirus).ti,ab,kf. |
| 3                                                                                                                                 | 1 or 2                                                                                                                                                                                                                                                                                                                                                    |
| 4                                                                                                                                 | Angiotensin-Converting Enzyme Inhibitors/ or exp Angiotensin Receptor Antagonists/                                                                                                                                                                                                                                                                        |
| 5                                                                                                                                 | (angiotensin?converting enzyme inhibitor\$1 or angiotensin receptor antagonist\$1 angiotensin receptor blocker\$1 or ACE?I or ARB\$1).ti,ab,kf                                                                                                                                                                                                            |
| 6                                                                                                                                 | 4 or 5                                                                                                                                                                                                                                                                                                                                                    |
| 7                                                                                                                                 | Thiazides/                                                                                                                                                                                                                                                                                                                                                |
| 8                                                                                                                                 | (thiazide\$1).ti,ab,kf                                                                                                                                                                                                                                                                                                                                    |
| 9                                                                                                                                 | 7 or 8                                                                                                                                                                                                                                                                                                                                                    |
| 10                                                                                                                                | 6 or 9                                                                                                                                                                                                                                                                                                                                                    |
| 11                                                                                                                                | 3 and 10                                                                                                                                                                                                                                                                                                                                                  |
| 12                                                                                                                                | limit 11 to years 2003-current                                                                                                                                                                                                                                                                                                                            |
| <b>Cochrane Library</b>                                                                                                           |                                                                                                                                                                                                                                                                                                                                                           |
| #                                                                                                                                 | Search Statement                                                                                                                                                                                                                                                                                                                                          |
| 1                                                                                                                                 | MeSH descriptor: [Middle East Respiratory Syndrome Coronavirus] this term only                                                                                                                                                                                                                                                                            |
| 2                                                                                                                                 | MeSH descriptor: [SARS Virus] this term only                                                                                                                                                                                                                                                                                                              |
| 3                                                                                                                                 | (Severe Acute Respiratory Syndrome Coronavirus 2 or COVID-19 or COVID19 or novel coronavirus or coronavirus or corona virus or SARS-CoV or SARS-CoV-2 or SARS2 or Middle East Respiratory Syndrome or MERS or MERS virus or MERS viruses or MERS-CoV or Severe Acute Respiratory Syndrome or SARS or SARS-CoV or SARS coronavirus):ti,ab,kw               |
| 4                                                                                                                                 | #1 OR #2 OR #3                                                                                                                                                                                                                                                                                                                                            |
| 5                                                                                                                                 | MeSH descriptor: [Angiotensin-Converting Enzyme Inhibitors] this term only                                                                                                                                                                                                                                                                                |
| 6                                                                                                                                 | MeSH descriptor: [Angiotensin Receptor Antagonists] explode all trees                                                                                                                                                                                                                                                                                     |
| 7                                                                                                                                 | (angiotensin?converting enzyme inhibitor? or angiotensin receptor antagonist? angiotensin receptor blocker? or ACE?I or ARB?):ti,ab,kw                                                                                                                                                                                                                    |
| 8                                                                                                                                 | #5 OR #6 OR #7                                                                                                                                                                                                                                                                                                                                            |
| 9                                                                                                                                 | MeSH descriptor: [Thiazides] this term only                                                                                                                                                                                                                                                                                                               |
| 10                                                                                                                                | (thiazide?):ti,ab,kw                                                                                                                                                                                                                                                                                                                                      |
| 11                                                                                                                                | #9 OR #10                                                                                                                                                                                                                                                                                                                                                 |
| 12                                                                                                                                | #8 OR #11                                                                                                                                                                                                                                                                                                                                                 |
| 13                                                                                                                                | #4 AND #12                                                                                                                                                                                                                                                                                                                                                |
| <b>ClinicalTrials.gov</b>                                                                                                         |                                                                                                                                                                                                                                                                                                                                                           |
| #                                                                                                                                 | Search Statement                                                                                                                                                                                                                                                                                                                                          |
| 1                                                                                                                                 | Condition or disease: Severe Acute Respiratory Syndrome OR Middle East Respiratory Syndrome OR COVID-19 OR SARS OR MERS OR CoV OR coronavirus                                                                                                                                                                                                             |
| 2                                                                                                                                 | Other terms: angiotensin-converting enzyme inhibitors OR angiotensin receptor antagonists OR ACE-I OR ARBs OR angiotensin receptor blocker OR thiazides                                                                                                                                                                                                   |
| 3                                                                                                                                 | #1 AND #2                                                                                                                                                                                                                                                                                                                                                 |

| <b>WHO database of publications on coronavirus disease (COVID-19)</b> |                                          |
|-----------------------------------------------------------------------|------------------------------------------|
| <b>#</b>                                                              | <b>Search Statement</b>                  |
| 1                                                                     | angiotensin-converting enzyme inhibitors |
| 2                                                                     | angiotensin receptor antagonists         |
| 3                                                                     | thiazides                                |
| medRxiv.org                                                           |                                          |
| <b>#</b>                                                              | <b>Search Statement</b>                  |
| 1                                                                     | angiotensin-converting enzyme inhibitors |
| 2                                                                     | angiotensin receptor antagonists         |

**Appendix B:** Quality Assessment of Cohort Studies using the Newcastle-Ottawa Quality Assessment Scale (26)

|                              | Selection                                       |                                                   |                               |                                                                                                                     | Comparability                                                                | Outcome                   |                                                                        |                                            |
|------------------------------|-------------------------------------------------|---------------------------------------------------|-------------------------------|---------------------------------------------------------------------------------------------------------------------|------------------------------------------------------------------------------|---------------------------|------------------------------------------------------------------------|--------------------------------------------|
| Author<br>(all year<br>2020) | Representativeness<br>of the exposed<br>cohort* | Selection<br>of the<br>non-<br>exposed<br>cohort* | Ascertainment<br>of exposure* | Demonstration<br>that outcome<br>of interest was<br>not present at<br>start of study,<br>OR baseline<br>assessment* | Comparability<br>of cohorts on<br>the basis of<br>the design or<br>analysis* | Assessment<br>of outcome* | Was<br>follow-up<br>long<br>enough<br>for<br>outcomes<br>to<br>occur?* | Adequacy<br>of follow<br>up of<br>cohorts* |
| Bean (29)                    | 1                                               | 1                                                 | 1                             | 1                                                                                                                   | 1                                                                            | 1                         | 1                                                                      | 1                                          |
| Feng (30)                    | 1                                               | 1                                                 | 0                             | 1                                                                                                                   | 0                                                                            | 1                         | 0                                                                      | 1                                          |
| Li (31)                      | 1                                               | 1                                                 | 0                             | 1                                                                                                                   | 1                                                                            | 1                         | 0                                                                      | 1                                          |
| Liu (32)                     | 1                                               | 1                                                 | 0                             | 1                                                                                                                   | 1                                                                            | 1                         | 0                                                                      | 1                                          |
| Mehra<br>(34)                | 1                                               | 1                                                 | 1                             | 1                                                                                                                   | 1                                                                            | 1                         | 1                                                                      | 1                                          |
| Meng (35)                    | 1                                               | 1                                                 | 0                             | 1                                                                                                                   | 0                                                                            | 1                         | 0                                                                      | 1                                          |
| Rentsch<br>(36)              | 1                                               | 1                                                 | 1                             | 1                                                                                                                   | 1                                                                            | 1                         | 0                                                                      | 1                                          |
| Reynolds<br>(37)             | 1                                               | 1                                                 | 1                             | 1                                                                                                                   | 1                                                                            | 1                         | 0                                                                      | 1                                          |
| Rossi (38)                   | 1                                               | 1                                                 | 0                             | 1                                                                                                                   | 1                                                                            | 1                         | 1                                                                      | 1                                          |
| Yang (39)                    | 1                                               | 1                                                 | 0                             | 1                                                                                                                   | 1                                                                            | 1                         | 1                                                                      | 1                                          |
| Peng (40)                    | 1                                               | 1                                                 | 0                             | 1                                                                                                                   | 0                                                                            | 1                         | 0                                                                      | 1                                          |
| Zeng (41)                    | 1                                               | 1                                                 | 0                             | 1                                                                                                                   | 0                                                                            | 1                         | 1                                                                      | 1                                          |
| Zhang<br>(42)                | 1                                               | 1                                                 | 0                             | 1                                                                                                                   | 1                                                                            | 1                         | 1                                                                      | 1                                          |

\*Key: Newcastle-Ottawa QA scale for Cohort studies

Representativeness of the exposed cohort

Enter 0 or 1:

1 = truly representative of the average \_\_ in the community

1 = somewhat representative of the average \_\_\_ in the community

0 = selected group of users, e.g., nurses, volunteers

0 = no description of the derivation of the cohort

Selection of the non-exposed cohort

*Enter 0 or 1:*

- 1 = drawn from the same community as the exposed cohort
- 0 = drawn from a different source
- 0 = no description of the derivation of the non-exposed cohort

Ascertainment of exposure

*Enter 0 or 1:*

- 1 = secure record
- 1 = structured interview
- 0 = written self-report
- 0 = no description

Demonstration that outcome of interest was not present at start of study, OR baseline assessment

*Enter 0 or 1:*

- 1 = yes
- 0 = no

Comparability of cohorts on the basis of the design or analysis

*Enter 0 or 1:*

- 1 = study accounts/controls for most important factors(s), e.g., age
- 0 = no adjustment for potential confounders

Assessment of outcome

*Enter 0 or 1:*

- 1 = independent blind assessment
- 1 = record linkage
- 0 = self-report
- 0 = no description

Was follow-up long enough for outcomes to occur?

*Enter 0 or 1:*

- 1 = yes
- 0 = no or unclear

Adequacy of follow up of cohorts

*Enter 0 or 1:*

- 1 = complete follow up; all subjects accounted for.
- 1 = subjects lost to follow up unlikely to introduce bias; small number (less than 20%) lost, or description was provided of those lost

0 = follow up rate < 80% and no description of those lost  
0 = no description

**Appendix C:** Quality Assessment of Case-control Studies using the Newcastle-Ottawa Quality Assessment Scale (26)

| <b>Study</b> | <b>Is the case definition adequate?</b><br><i>Enter 0 or 1:</i><br>1 = yes, with independent validation<br>1 = yes, eg record linkage or based on self reports<br>0 = no description | <b>Representativeness of the cases</b><br><i>Enter 0 or 1:</i><br>1 = consecutive or obviously representative series of cases<br>0 = potential for selection biases or not stated | <b>Selection of Controls</b><br><i>Enter 0 or 1:</i><br>1 = community controls<br>0 = hospital controls<br>0 = no description | <b>Definition of Controls</b><br><i>Enter 0 or 1:</i><br>1 = no history of disease (endpoint)<br>0 = no description of source | <b>Comparability of cases and controls on the basis of the design or analysis</b><br><i>Add points:</i><br><i>Minimum 0, Maximum 2</i><br>1 = study controls for age, demographic factors<br>1 = study controls for cardiovascular comorbidities<br>0 = neither of the above | <b>Ascertainment of exposure</b><br><i>Enter 0 or 1:</i><br>1 = secure record (eg surgical records)<br>1 = structured interview where blind to case/control status<br>0 = interview not blinded to case/control status<br>0 = written self report or medical record only<br>0 = no description | <b>Same method of ascertainment for cases and controls</b><br><i>Enter 0 or 1:</i><br>1 = yes<br>0 = no | <b>Non-Response rate</b><br><i>Enter 0 or 1:</i><br>1 = same rate for both groups<br>0 = non respondents described<br>0 = rate different and no designation |
|--------------|--------------------------------------------------------------------------------------------------------------------------------------------------------------------------------------|-----------------------------------------------------------------------------------------------------------------------------------------------------------------------------------|-------------------------------------------------------------------------------------------------------------------------------|-------------------------------------------------------------------------------------------------------------------------------|------------------------------------------------------------------------------------------------------------------------------------------------------------------------------------------------------------------------------------------------------------------------------|------------------------------------------------------------------------------------------------------------------------------------------------------------------------------------------------------------------------------------------------------------------------------------------------|---------------------------------------------------------------------------------------------------------|-------------------------------------------------------------------------------------------------------------------------------------------------------------|
| Mancia (33)  | 1                                                                                                                                                                                    | 1                                                                                                                                                                                 | 1                                                                                                                             | 1                                                                                                                             | 2                                                                                                                                                                                                                                                                            | 1                                                                                                                                                                                                                                                                                              | 1                                                                                                       | 1                                                                                                                                                           |
